# Supplementary material for: Transcriptomic response of maize primary roots to low temperatures at seedling emergence
Source: PeerJ journal article supplement (doi:10.7717/peerj.2839), 2017-01-05
Supplement: Supplemental_Figure_1.pdf [file Supplemental_Figure_1.pdf]

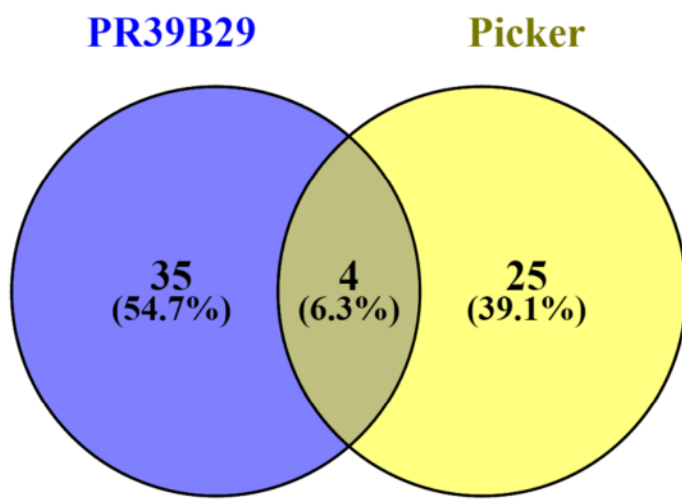

Supplemental Figure 1. Venn diagram of the number of differentially expressed and shared genes amongst maize varieties PR39B29 and Picker.
